# Supplementary material
Source: MDPI journal article supplement (https://www.mdpi.com/2297-8739/9/6/151)
Supplement: s1 [file s1]

## Supplemental Information

### SI.1. System Characteristics

The full system characteristics for the MBR-MD and Baseline systems are provided in Tables S1 and S2, respectively. An influent wastewater flow of 2,500 m<sup>3</sup>/day was used for both systems.

**Table S1.** System characteristics for the MBR-MD system including parameters for Equations 1 and 2, DO concentrations, recycle rates, chemical dosing, membrane characteristics, feed and coolant temperatures, and UV specifications.

| Module                            | Value            | Units                      |
|-----------------------------------|------------------|----------------------------|
| <b>Membrane Bioreactor (MBR)</b>  |                  |                            |
| Anaerobic volume                  | 190              | m <sup>3</sup>             |
| Anoxic volume                     | 380              | m <sup>3</sup>             |
| Aerobic volume                    | 1,000            | m <sup>3</sup>             |
| Aerobic DO concentration          | 0.20             | mg/L                       |
| UF volume                         | 140              | m <sup>3</sup>             |
| UF DO concentration               | 3.0              | mg/L                       |
| Mixed liquor/RAS recycle rate     | 300              | % of influent              |
| Anoxic to anaerobic recycle rate  | 200              | % of influent              |
| NaClO concentration               | 11               | mg/L                       |
| SRT                               | 12               | days                       |
| Max transmembrane pressure (TMP)  | 55               | kPa                        |
| UF membrane type                  | PVDF             | -                          |
| UF membrane product               | Suez ZW 500M, 1M | -                          |
| Pump head                         | 1.0              | m                          |
| Pump efficiency                   | 0.8              | -                          |
| Methane emission factor           | 0.63             | mass % of COD inf.         |
| Nitrous oxide emission factor     | 0.017            | mass % of TKN inf.         |
| Dewatering power consumption      | 0.7              | kWh/m <sup>3</sup> -sludge |
| Mixing power consumption          | 0.055            | kWh/m <sup>3</sup>         |
| <b>Membrane Distillation (MD)</b> |                  |                            |
| Membrane thickness                | 67               | µm                         |
| Membrane porosity                 | 0.81             | -                          |
| Membrane pore size                | 0.45             | µm                         |
| Membrane area                     | 7.2              | m <sup>2</sup>             |
| Feed temperature                  | 80               | °C                         |
| Coolant temperature               | 20               | °C                         |
| Feed flowrate                     | 9.1              | L/min                      |
| Coolant flowrate                  | 9.1              | L/min                      |
| <b>Ultraviolet (UV)</b>           |                  |                            |
| UV system                         | Viqual S2Q-PA    | -                          |

|                      |       |                    |
|----------------------|-------|--------------------|
| UV dose              | 40    | mJ/cm <sup>2</sup> |
| UV power consumption | 0.055 | kWh/m <sup>3</sup> |

**Table S2.** System characteristics for the Baseline system including parameters for Equations 1, 3, and 4, DO concentration, recycle rates, chemical dosing, membrane characteristics, sizing configurations, and UV specifications.

| Module                                       | Value              | Units                      |
|----------------------------------------------|--------------------|----------------------------|
| <b>Conventional Treatment</b>                |                    |                            |
| Overflow rate                                | 36                 | m/day                      |
| Hydraulic retention time                     | 2.0                | hr                         |
| BOD loading rate                             | 0.3                | kg BOD/day/m <sup>3</sup>  |
| Estimated BOD concentration                  | 250                | mg/L                       |
| Primary clarifier volume                     | 200                | m <sup>3</sup>             |
| Secondary clarifier volume                   | 200                | m <sup>3</sup>             |
| Aeration tank volume                         | 2,080              | m <sup>3</sup>             |
| Aeration tank DO concentration               | 4.0                | mg/L                       |
| RAS recycle rate                             | 70                 | % of influent              |
| FeCl <sub>3</sub> concentration              | 12                 | mg/L                       |
| SRT                                          | 6.0                | days                       |
| Pump head                                    | 1.0                | m                          |
| Pump efficiency                              | 0.8                | -                          |
| Methane emission factor                      | 0.63               | mass % of COD inf.         |
| Nitrous oxide emission factor                | 0.017              | mass % of TKN inf.         |
| Dewatering power consumption                 | 0.70               | kWh/m <sup>3</sup> -sludge |
| Mixing power consumption                     | 0.055              | kWh/m <sup>3</sup>         |
| <b>Microfiltration (MF)</b>                  |                    |                            |
| MF membrane type                             | PVDF               | -                          |
| MF membrane product                          | DuPont SFD-2660    | -                          |
| Total trains                                 | 10                 | -                          |
| Modules/train                                | 12                 | -                          |
| Max transmembrane pressure (TMP)             | 210                | kPa                        |
| MF recovery                                  | 90                 | %                          |
| Ca(OH) <sub>2</sub> concentration            | 15                 | mg/L                       |
| Citric acid concentration                    | 0.2                | mg/L                       |
| NaOH concentration                           | 3.6                | mg/L                       |
| <b>Reverse Osmosis (RO)</b>                  |                    |                            |
| RO membrane type                             | Polyamide          | -                          |
| RO membrane product                          | DuPont BW30HR-440i | -                          |
| RO recovery                                  | 85                 | %                          |
| NaClO concentration                          | 11                 | mg/L                       |
| H <sub>2</sub> SO <sub>4</sub> concentration | 24                 | mg/L                       |
| RO stages                                    | 5                  | -                          |
| RO pressure vessels/stage                    | 2                  | -                          |

|                                                        |      |                    |
|--------------------------------------------------------|------|--------------------|
| RO elements/pressure vessel                            | 7    | -                  |
| <b>Ultraviolet-Advanced Oxidation Process (UV-AOP)</b> |      |                    |
| UV power consumption                                   | 0.07 | kWh/m <sup>3</sup> |

The system characteristics of Tables S1 and S2 were then used in the respective models to calculate the energy consumption, direct air emissions, sludge wasting, and water quality for MBR-MD and Baseline using the feed solution of Table 1. Wastewater fraction, aeration/mass transfer, kinetic, stoichiometric, settling, biofilm, and physical/chemical parameters in BioWin were all set to default values for both MBR-MD and Baseline systems.

## SI.2. Air Gap MD and Baseline Modeling

The MD modeling process developed by [35] is shown schematically in Figure S1. In this model, a counter-current air gap MD process is simulated by inputting the required membrane characteristics and operating conditions (Table S1) and calculating the water flux and outlet temperatures. The model is first run by inputting a guess for the coolant outlet. The  $T_{\text{guess}}$  is then used in the model to calculate the coolant inlet—if the calculated coolant inlet ( $T_{\text{c,n}}$ ) does not match the known coolant inlet ( $T_{\text{c,known}} = 20^\circ\text{C}$ ) the model is run again using an updated  $T_{\text{guess}}$  until the calculated coolant inlet is equal to the known coolant inlet.

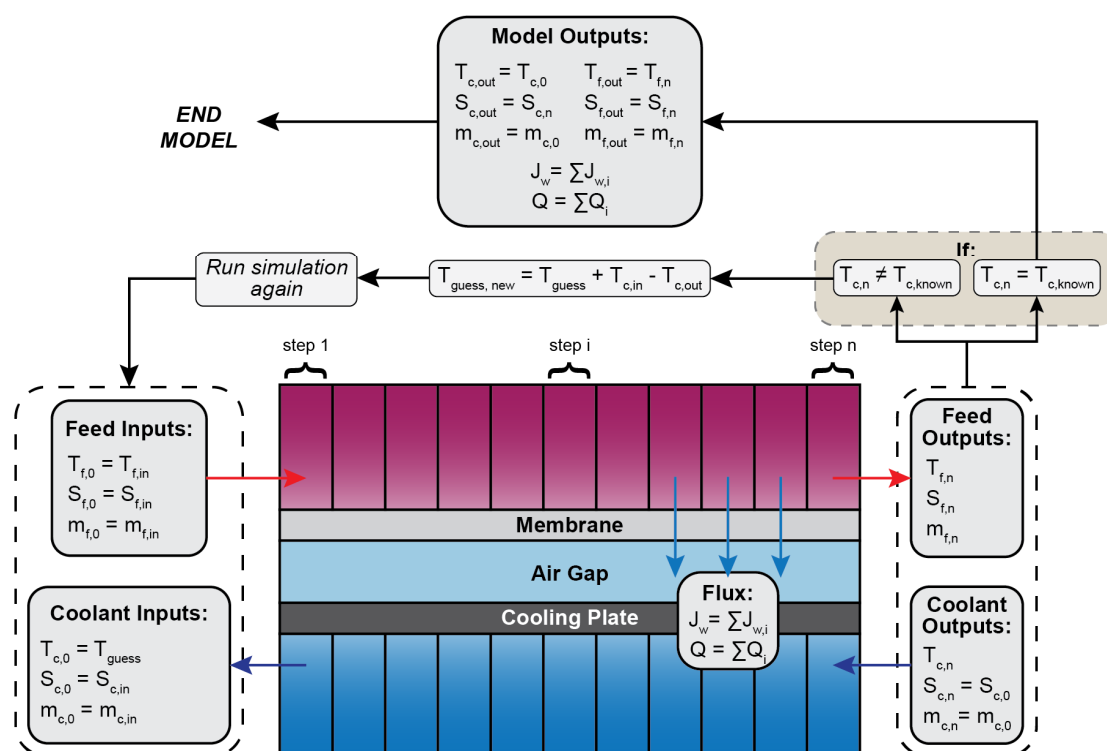

**Figure S1.** MD modeling process for a counter-current configuration.

Seawater property equations from [36] used for the stepwise MD model are provided in Table S3.

**Table S3.** Equations from [36] for the thermophysical properties of saline and pure water.

| Parameter            | Quality | Equation Number from [36] |
|----------------------|---------|---------------------------|
| Vapor Pressure       | Saline  | Eq. 29                    |
|                      | Pure    | Eq. 53                    |
| Density              | Saline  | Eq. 5                     |
|                      | Pure    | Eq. 50                    |
| Viscosity            | Saline  | Eq. 20                    |
|                      | Pure    | Eq. 21                    |
| Specific Heat        | Saline  | Eq. 9                     |
|                      | Pure    | Eq. 51                    |
| Thermal Conductivity | Saline  | Eq. 13                    |
|                      | Pure    | Eq. 52                    |
| Heat of Evaporation  | Saline  | Eq. 37                    |
|                      | Pure    | Eq. 54                    |
| Specific Enthalpy    | Saline  | Eq. 43                    |
|                      | Pure    | Eq. 55                    |

The average MD rejection of ammonia, COD, nitrate, nitrite, phosphate, TN, and TOC from various references Table S4) were used to obtain the final effluent quality from the MBR-MD system.

**Table S4.** MD rejections for common water quality contaminants and their respective sources.

| Reference | Rejection (%)       |       |                     |                     |                     |      |      |
|-----------|---------------------|-------|---------------------|---------------------|---------------------|------|------|
|           | NH <sub>4</sub> – N | COD   | NO <sub>3</sub> – N | NO <sub>2</sub> – N | PO <sub>4</sub> – P | TN   | TOC  |
| [3]       | 60                  | 99.99 | -                   |                     | 91                  | -    | -    |
| [4]       | 98.73               | -     | 99.81               | 99.99               | 99.99               | -    | -    |
| [5]       | -                   | -     | -                   | -                   | -                   | -    | 99.5 |
| [6]       | 53.1                | 97.2  | -                   | -                   | -                   | -    | -    |
| [7]       | -                   | 46.2  | -                   | -                   | -                   | 63.7 | -    |
| [8]       | 89.5                | 84.62 | -                   | -                   | -                   | -    | -    |
| [9]       | -                   | 98.64 | -                   | -                   | -                   | -    | -    |
| [10]      | -                   | 89.6  | -                   | -                   | -                   | -    | -    |
| [11]      | -                   | 89    | -                   | -                   | -                   | -    | -    |
| [12]      | 50                  | 96    | -                   | -                   | -                   | -    | -    |
| [13]      | 70                  | 99    | -                   | -                   | -                   | -    | -    |

|                |       |       |       |       |       |       |       |
|----------------|-------|-------|-------|-------|-------|-------|-------|
| [14]           | 94.52 | -     | -     | -     | -     | 94.07 | 92.04 |
| [15]           | -     | 95.3  | -     | -     | -     | -     | 95.7  |
| [16]           | -     | -     | -     | -     | -     | 98    | 98    |
| [17]           | -     | -     | -     | -     | -     | -     | 49.1  |
| [18]           | 34    | 89.11 | -     | -     | -     | -     | -     |
| [19]           | 99.89 | -     | -     | -     | -     | 99.82 | 96.58 |
| <b>Average</b> | 72.19 | 89.51 | 99.81 | 99.99 | 95.50 | 88.90 | 88.49 |

In the Baseline modeling process, predicted effluent concentrations were compared to operational effluent concentrations from OCWD to validate the model for the Baseline (Table S5). Overall, results from the modeled and operational scenarios are in agreement with only slight variations in effluent water concentrations. Compared to operational data from OCWD, the modeled effluent is marginally lower in ammonia and TOC while exhibiting slightly higher concentrations for phosphate, TN, and TON [41]. These slight discrepancies could be due to the model's idealized nature and the subsequent exclusion of operational failures or issues such as MF/RO membrane fouling or scaling, pump malfunctions, or other equipment failures.

**Table S5.** Operational water quality data compared to modeled water quality data for the Baseline system.

| Parameter          | OCWD<br>(operational)* | Baseline<br>(modeled) |
|--------------------|------------------------|-----------------------|
| COD                | 7.58                   | 7.43                  |
| NH <sub>4</sub> -N | 0.1                    | 0.01                  |
| NO <sub>3</sub> -N | 0.67                   | 0.70                  |
| NO <sub>2</sub> -N | 0.033                  | 0.0038                |
| ON                 | 0.02                   | 0.12                  |
| TN                 | 0.80                   | 0.83                  |
| PO <sub>4</sub> -P | 0.01                   | 0.09                  |
| TOC                | 0.11                   | 0.06                  |
| TSS                | 0                      | 0                     |

\*Operational data obtained from the 2019 Annual GWRS Report [41].

Literature values for the available waste heat at various sized power plants (Table S6) were used to estimate what proportion of the MD energy requirements that could be met with waste heat for a hypothetical full-scale system. The LCA was run using different proportions of waste heat to determine the dependence of impacts on grid electricity use.

**Table S6.** Values for the amount of waste heat available from power plants found in the literature. Values were scaled to the OCWD effluent flow and the required grid energy for the MD system was subsequently calculated.

| Power Plant<br>Waste Heat<br>(MW) | Scaled Waste<br>Heat Available<br>(kWh/m <sup>3</sup> ) | Required MD<br>Grid Energy<br>(kWh/m <sup>3</sup> ) | MD Grid<br>Energy<br>Percentage | LCA<br>Scenario<br>Name | Source |
|-----------------------------------|---------------------------------------------------------|-----------------------------------------------------|---------------------------------|-------------------------|--------|
| 200                               | 13.8                                                    | 160                                                 | 92%                             | MBR-92                  | [82]   |
| 700                               | 48.3                                                    | 125                                                 | 72%                             | MBR-72                  | [45]   |
| 1,018                             | 70.3                                                    | 103                                                 | 60%                             | MBR-60                  | [83]   |
| 1,364                             | 94.2                                                    | 79.5                                                | 46%                             | MBR-46                  | [84]   |
| 1,888                             | 130                                                     | 43.3                                                | 25%                             | MBR-<br>MD-25           | [85]   |
| 2,243                             | 155                                                     | 18.8                                                | 11%                             | MBR-<br>MD-11           | [86]   |
| 2,400                             | 166                                                     | 8.00                                                | 5%                              | MBR-<br>MD-5            | [87]   |
| 3,467                             | 239                                                     | 0                                                   | 0%                              | MBR-<br>MD-0            | [88]   |

Emissions factors used to calculate the direct emissions of CH<sub>4</sub> and N<sub>2</sub>O from the biotreatment by the MBR-MD and Baseline systems are shown in Table S7.

**Table S7.** Literature sources for the emissions factors.

| Authors        | N <sub>2</sub> O EF (% of<br>TKN inf.) | CH <sub>4</sub> EF (% of<br>COD inf.) |
|----------------|----------------------------------------|---------------------------------------|
| [29]           | 0.0425                                 | -                                     |
| [30]           | 0.001                                  | -                                     |
| [31]           | 0.0205                                 | -                                     |
| [32]           | -                                      | 0.16                                  |
| [33]           | -                                      | 0.08                                  |
| [34]           | -                                      | 0.87                                  |
| [34]           | -                                      | 0.53                                  |
| [34]           | -                                      | 1.2                                   |
| [34]           | -                                      | 0.8                                   |
| [35]           | -                                      | 0.85                                  |
| [35]           | -                                      | 0.7                                   |
| [36]           | -                                      | 1.13                                  |
| [37]           | 0.0045                                 | 0.007                                 |
| <b>Average</b> | 0.0171                                 | 0.633                                 |

### SI.3. Baseline Process Flow

The process flow diagram for the Baseline potable reuse scheme is shown in Figure S3. Wastewater is first pumped to a primary clarifier where a ferric chloride ( $\text{FeCl}_3$ ) coagulant is added to promote the formation of flocs and the removal of phosphorus. These flocs then settle to the bottom of the clarifier where they are pumped out and disposed of as primary sludge. The rest of the wastewater is then sent from the top of the clarifier to an aeration basin to allow sufficient oxygen for the microorganisms in the activated sludge. The wastewater is then sent to a secondary clarifier where sedimentation occurs and the secondary sludge is wasted from the bottom. A portion of the secondary sludge is sent back to the aeration tank as the RAS recycle and the remaining is wasted. After the biological treatment, the treated wastewater is sent to the MF and RO systems for further purification. Concentrate from the RO system is disposed of offshore. As the final treatment process, the purified water is sent through a UV-AOP system to further remove any pathogenic viruses and bacteria. The final product water is of very high quality and is suitable for indirect potable reuse.

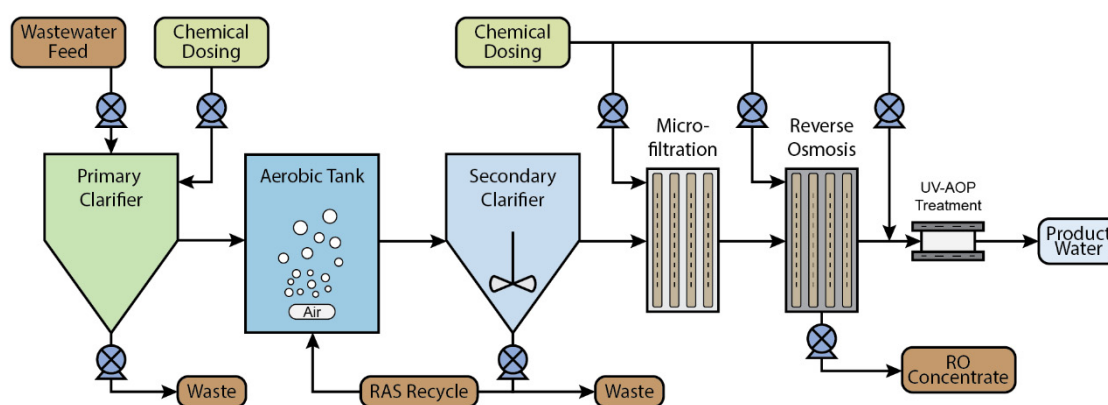

**Figure S2.** Process flow diagram for the Baseline system developed from OCSD and OCWD.

#### SI.4. Modeling Results

Results from the MBR-MD modeling are given in Table S8. These results were obtained by the modeling processes outlined in Sections 2.3.2 and 2.3.3 and by using the inputs shown in Table S1.

**Table S8.** MBR-MD modeling results for the MBR, MD, and UV sub-systems. Results include energy consumption, sludge wasting, recycle/effluent flow rates, and air flow rates.

| Module                           | Value  | Units              |
|----------------------------------|--------|--------------------|
| <i>Membrane Bioreactor (MBR)</i> |        |                    |
| Air flow rate                    | 9,120* | m <sup>3</sup> /hr |

|                                   |                     |                     |
|-----------------------------------|---------------------|---------------------|
| Blower power                      | 0.52*               | kWh/m <sup>3</sup>  |
| RAS flow                          | 7,410*              | m <sup>3</sup> /day |
| Anoxic to anaerobic flow          | 5,000*              | m <sup>3</sup> /day |
| Aerobic to anoxic flow            | 6,250*              | m <sup>3</sup> /day |
| Secondary solids mass             | 479*                | kg/day              |
| Secondary dewatering volume       | 92.7*               | m <sup>3</sup> /day |
| Dewatering power                  | 0.027 <sup>†</sup>  | kWh/m <sup>3</sup>  |
| Influent pump                     | 0.004 <sup>§</sup>  | kWh/m <sup>3</sup>  |
| Anoxic to anaerobic pump          | 0.007 <sup>§</sup>  | kWh/m <sup>3</sup>  |
| Aerobic to anoxic pump            | 0.009 <sup>§</sup>  | kWh/m <sup>3</sup>  |
| UF permeate pump                  | 0.019 <sup>§</sup>  | kWh/m <sup>3</sup>  |
| RAS pump                          | 0.010 <sup>§</sup>  | kWh/m <sup>3</sup>  |
| Effluent flow                     | 2,420*              | m <sup>3</sup> /day |
| <b>Membrane Distillation (MD)</b> |                     |                     |
| Specific thermal energy           | 174**               | kWh/m <sup>3</sup>  |
| Feed pump                         | 0.038 <sup>§</sup>  | kWh/m <sup>3</sup>  |
| Coolant pump                      | 0.038 <sup>§</sup>  | kWh/m <sup>3</sup>  |
| Effluent flow                     | 2,420**             | m <sup>3</sup> /day |
| <b>Ultraviolet (UV)</b>           |                     |                     |
| Specific energy consumption       | 0.055 <sup>††</sup> | kWh/m <sup>3</sup>  |

\*BioWin modeling results, <sup>†</sup>Calculated from literature values, <sup>§</sup>Calculated from relevant equations in the literature, \*\*MD modeling results from [35], <sup>††</sup>Calculated from manufacturer specifications.

The majority of the MBR energy demand is from aeration and dewatering (Table S8). Of all the pumps, the UF permeate pump has the highest energy demand, followed by the RAS and other recycle pumps. For the MD module, the STEC is significantly higher than the SEC due to pumping.

Results from the Baseline modeling are given in Table S9. These results were obtained by the modeling processes outlined in Section 2.3.4 and by using the inputs shown in Table S2.

**Table S9.** Baseline modeling results for the conventional treatment, MF, RO, and UV sub-systems. Results include energy consumption, sludge wasting, recycle/effluent flow rates, and air flow rates.

| Module                        | Value  | Units               |
|-------------------------------|--------|---------------------|
| <b>Conventional Treatment</b> |        |                     |
| Air flow rate                 | 2,450* | m <sup>3</sup> /hr  |
| Blower power                  | 0.403* | kWh/m <sup>3</sup>  |
| RAS flow                      | 1,670* | m <sup>3</sup> /day |
| Primary solids mass           | 461*   | kg/day              |
| Secondary solids mass         | 147*   | kg/day              |

|                                                            |                      |                     |
|------------------------------------------------------------|----------------------|---------------------|
| Primary dewatering volume                                  | 25*                  | m <sup>3</sup> /day |
| Secondary dewatering volume                                | 79.8*                | m <sup>3</sup> /day |
| Dewatering power                                           | 0.030 <sup>†</sup>   | kWh/m <sup>3</sup>  |
| Effluent flow                                              | 2,420*               | m <sup>3</sup> /day |
| Influent pump                                              | 0.004 <sup>§</sup>   | kWh/m <sup>3</sup>  |
| Chemical pump                                              | 5.70e-7 <sup>§</sup> | kWh/m <sup>3</sup>  |
| Primary solids pump                                        | 5.50e-6 <sup>§</sup> | kWh/m <sup>3</sup>  |
| RAS pump                                                   | 2.46e-3 <sup>§</sup> | kWh/m <sup>3</sup>  |
| Effluent pump                                              | 3.40e-3 <sup>§</sup> | kWh/m <sup>3</sup>  |
| <b>Microfiltration (MF)</b>                                |                      |                     |
| Influent pump                                              | 0.171 <sup>§§</sup>  | kWh/m <sup>3</sup>  |
| Cleaning in place pump                                     | 9.3e-3 <sup>§§</sup> | kWh/m <sup>3</sup>  |
| Backwashing pump                                           | 0.092 <sup>§§</sup>  | kWh/m <sup>3</sup>  |
| Air scour pump                                             | 2.1e-3 <sup>§§</sup> | kWh/m <sup>3</sup>  |
| Effluent flow                                              | 2,160 <sup>§§</sup>  | m <sup>3</sup> /day |
| <b>Reverse Osmosis (RO)</b>                                |                      |                     |
| Specific energy                                            | 1.08 <sup>§§</sup>   | kWh/m <sup>3</sup>  |
| RO concentrate                                             | 324 <sup>§§</sup>    | m <sup>3</sup> /day |
| Effluent flow                                              | 1,840 <sup>§§</sup>  | m <sup>3</sup> /day |
| <b>Ultraviolet-Advanced<br/>Oxidation Process (UV-AOP)</b> |                      |                     |
| UV power consumption                                       | 0.070 <sup>†</sup>   | kWh/m <sup>3</sup>  |

\*BioWin modeling results, <sup>†</sup>Calculated from literature values, <sup>§</sup>Calculated from relevant equations in the literature,

<sup>††</sup>Calculated from manufacturer specifications, <sup>§§</sup>WAVE modeling results.

Similar to the MBR, a majority of the conventional treatment energy demand is from aeration and dewatering. Of all the pumps in the conventional treatment process, the influent pump has the highest energy demand. This is also true for the UF system where the influent pump accounts for more than 65% of the total pumping energy demand.

### SI.5. Environmental Impact Results

Environmental impact results for the Baseline (Figure S3) and MBR-MD-0 (Figure S4) are shown below.

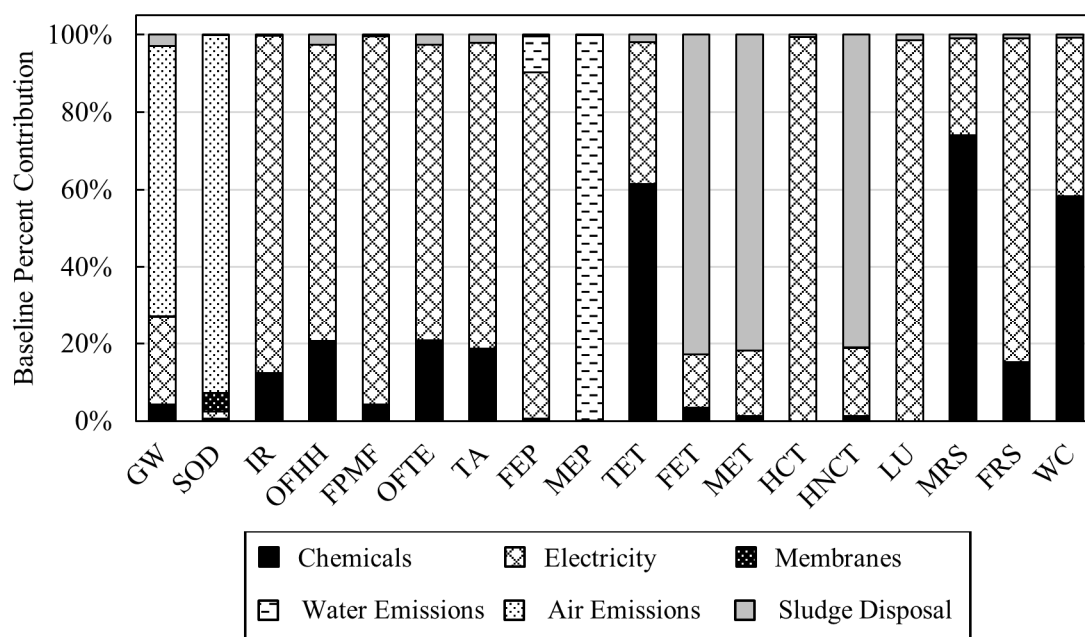

**Figure S3.** Percentage contributions to each impact category for the Baseline system.

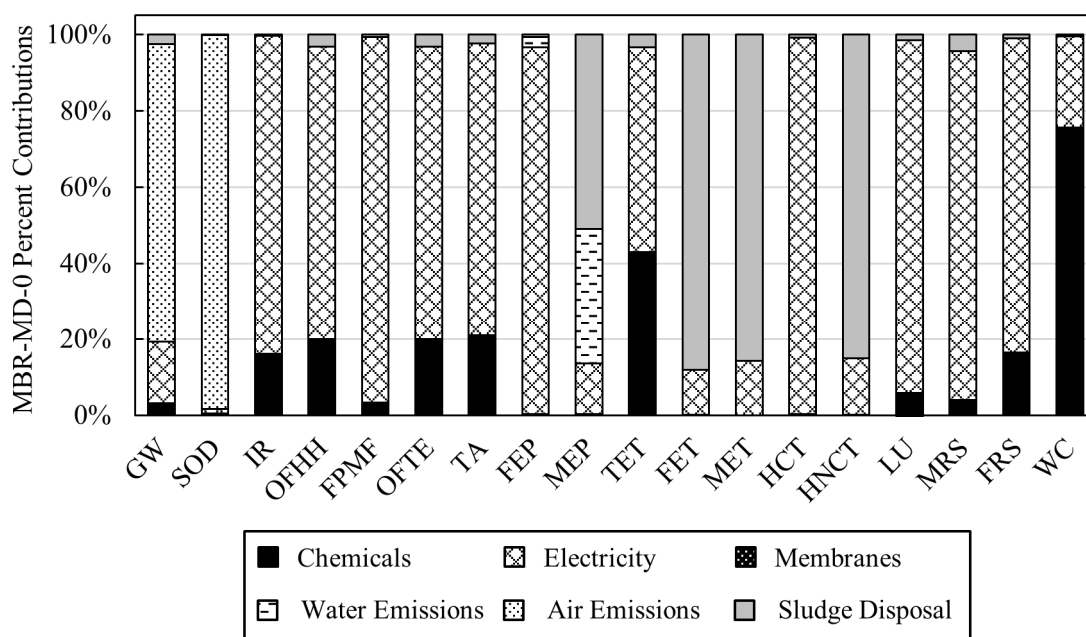

**Figure S4.** Percentage contributions to each impact category for the MBR-MD-0 scenario of the MBR-MD system when 100% waste heat is used for MD energy requirements.

Environmental impact results for the MBR-MD-11 (11% of MD heat supplied from the electrical grid) and MBR-MD-25 (25% of MD heat supplied from electrical grid) are show below. In the MBR-MD-5 scenario (Figure S5), each impact category except for SOD and MEP has a higher environmental impact compared to the Baseline. These increased impacts are due entirely to the increased grid energy consumption by

the MD module. Increasing the MD grid energy percentage to 25% (Fig. S6) results in even larger environmental impacts compared to the Baseline. The largest impact category in the MBR-MD-25 scenario is HCT, with an impact greater than 2,800% of the Baseline. Several other impact categories display impacts greater than 1,000% of the Baseline. For the MBR-MD-25 scenario, SOD and MEP are the only impact categories where the total impacts are less than the Baseline and electricity consumption is not the largest contributor.

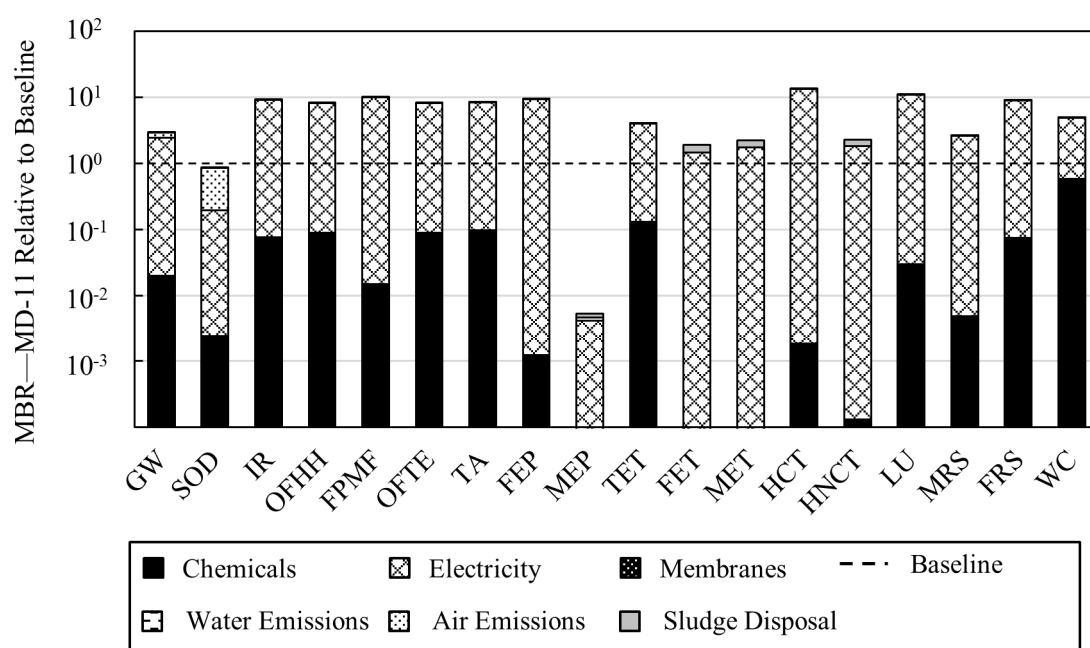

**Figure S5.** Percentage contributions to each impact category for the MBR-MD-11 scenario of the MBR-MD system scaled to the Baseline system. The dashed line represents 100% as a comparison to the Baseline.

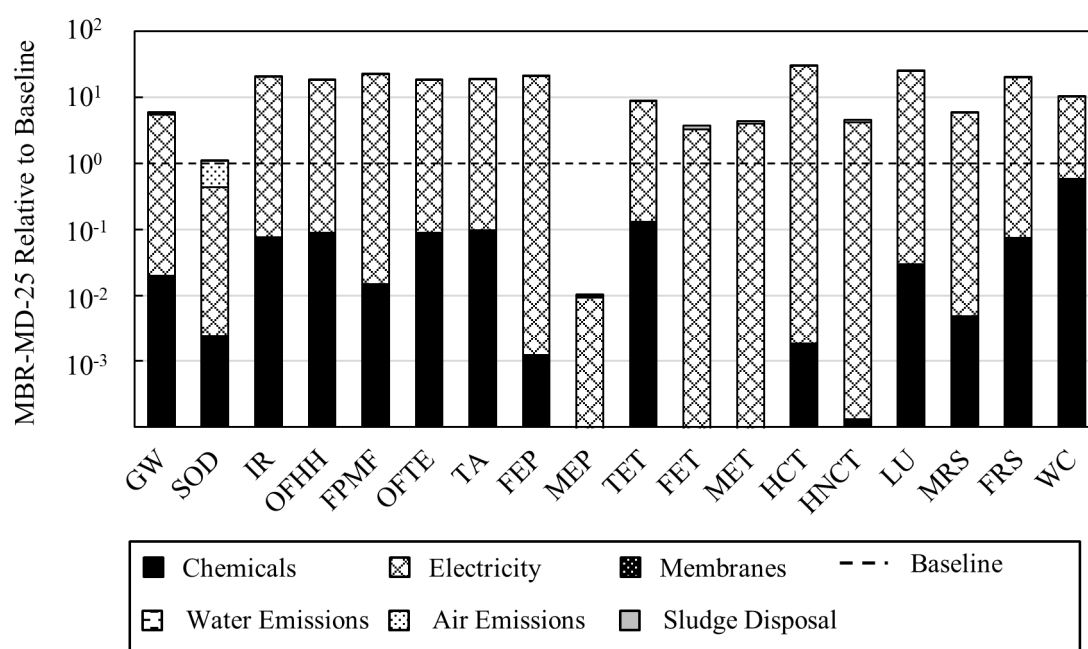

**Figure S6.** Percentage contributions to each impact category for the MBR-MD-25 scenario of the MBR-MD system scaled to the Baseline system. The dashed line represents 100% as a comparison to the Baseline [20–22,35,36,41,45,77–106].

## SI.6. References

35. Noamani, S.; Niroomand, S.; Rastgar, M.; Azhdarzadeh, M.; Sadrzadeh, M. Modeling of Air-Gap Membrane Distillation and Comparative Study with Direct Contact Membrane Distillation. *Ind. Eng. Chem. Res.* **2020**, *59*, 21930–21947, doi:10.1021/ACS.IECR.0C04464/SUPPL\_FILE/IE0C04464\_SI\_001.PDF.
36. Sharqawy, M.H.; Lienhard V, J.H.; Zubair, S.M. Thermophysical Properties of Seawater: A Review of Existing Correlations and Data. *Desalin. Water Treat.* **2010**, *16*, 354–380, doi:10.5004/DWT.2010.1079.
21. Song, X.; Luo, W.; McDonald, J.; Khan, S.J.; Hai, F.I.; Price, W.E.; Nghiem, L.D. An Anaerobic Membrane Bioreactor – Membrane Distillation Hybrid System for Energy Recovery and Water Reuse: Removal Performance of Organic Carbon, Nutrients, and Trace Organic Contaminants. *Sci. Total Environ.* **2018**, *628–629*, 358–365, doi:10.1016/J.SCITOTENV.2018.02.057.
77. Volpin, F.; Jiang, J.; El Saliby, I.; Preire, M.; Lim, S.; Hasan Johir, M.A.; Cho, J.; Han, D.S.; Phuntsho, S.; Shon, H.K. Sanitation and Dewatering of Human Urine via Membrane Bioreactor and Membrane Distillation and Its Reuse for Fertilization. *J. Clean. Prod.* **2020**, *270*, 122390, doi:10.1016/J.JCLEPRO.2020.122390.
78. Nguyen, N.C.; Nguyen, H.T.; Chen, S.S.; Ngo, H.H.; Guo, W.; Chan, W.H.; Ray, S.S.; Li, C.W.; Hsu, H. Te A Novel Osmosis Membrane Bioreactor-Membrane Distillation Hybrid System for Wastewater Treatment and Reuse. *Bioresour. Technol.* **2016**, *209*, 8–15, doi:10.1016/j.biortech.2016.02.102.
89. Jacob, P.; Phungsai, P.; Fukushi, K.; Visvanathan, C. Direct Contact Membrane Distillation for Anaerobic Effluent Treatment. *J. Memb. Sci.* **2015**, *475*, 330–339, doi:10.1016/J.MEMSCI.2014.10.021.
99. Tibi, F.; Guo, J.; Ahmad, R.; Lim, M.; Kim, M.; Kim, J. Membrane Distillation as Post-Treatment for Anaerobic Fluidized Bed Membrane Bioreactor for Organic and Nitrogen Removal. *Chemosphere* **2019**, *234*, 756–762, doi:10.1016/J.CHEMOSPHERE.2019.06.043.

100. Kwon, D.; Bae, W.; Kim, J. Hybrid Forward Osmosis/Membrane Distillation Integrated with Anaerobic Fluidized Bed Bioreactor for Advanced Wastewater Treatment. *J. Hazard. Mater.* **2021**, *404*, 124160, doi:10.1016/J.JHAZMAT.2020.124160.
20. Shirazi, M.M.A.; Bazgir, S.; Meshkani, F. A Novel Dual-Layer, Gas-Assisted Electrospun, Nanofibrous SAN4-HIPS Membrane for Industrial Textile Wastewater Treatment by Direct Contact Membrane Distillation (DCMD). *J. Water Process Eng.* **2020**, *36*, 101315, doi:10.1016/J.JWPE.2020.101315.
101. Mokhtar, N.M.; Lau, W.J.; Ismail, A.F.; Kartohardjono, S.; Lai, S.O.; Teoh, H.C. The Potential of Direct Contact Membrane Distillation for Industrial Textile Wastewater Treatment Using PVDF-Cloisite 15A Nanocomposite Membrane. *Chem. Eng. Res. Des.* **2016**, *111*, 284–293, doi:10.1016/J.CHERD.2016.05.018.
106. Li, F.; Huang, J.; Xia, Q.; Lou, M.; Yang, B.; Tian, Q.; Liu, Y. Direct Contact Membrane Distillation for the Treatment of Industrial Dyeing Wastewater and Characteristic Pollutants. *Sep. Purif. Technol.* **2018**, *195*, 83–91, doi:10.1016/J.SEPPUR.2017.11.058.
103. Davey, C.J.; Liu, P.; Kamranvand, F.; Williams, L.; Jiang, Y.; Parker, A.; Tyrrel, S.; McAdam, E.J. Membrane Distillation for Concentrated Blackwater: Influence of Configuration (Air Gap, Direct Contact, Vacuum) on Selectivity and Water Productivity. *Sep. Purif. Technol.* **2021**, *263*, 118390, doi:10.1016/J.SEPPUR.2021.118390.
104. Zoungrana, A.; Zengin, İ.H.; Elcik, H.; Özkaya, B.; Çakmakci, M. The Treatability of Landfill Leachate by Direct Contact Membrane Distillation and Factors Influencing the Efficiency of the Process. *Desalin. WATER Treat.* **2017**, *71*, 233–243, doi:10.5004/DWT.2017.20494.
79. Zhou, Y.; Huang, M.; Deng, Q.; Cai, T. Combination and Performance of Forward Osmosis and Membrane Distillation (FO-MD) for Treatment of High Salinity Landfill Leachate. *Desalination* **2017**, *420*, 99–105, doi:10.1016/J.DESAL.2017.06.027.
102. Wu, Y.; Kang, Y.; Zhang, L.; Qu, D.; Cheng, X.; Feng, L. Performance and Fouling Mechanism of Direct Contact Membrane Distillation (DCMD) Treating Fermentation Wastewater with High Organic Concentrations. *J. Environ. Sci. (China)* **2018**, *65*, 253–261, doi:10.1016/J.JES.2017.01.015.
22. Luo, W.; Phan, H. V.; Li, G.; Hai, F.I.; Price, W.E.; Elimelech, M.; Nghiem, L.D. An Osmotic Membrane Bioreactor-Membrane Distillation System for Simultaneous Wastewater Reuse and Seawater Desalination: Performance and Implications. *Environ. Sci. Technol.* **2017**, *51*, 14311–14320, doi:10.1021/acs.est.7b02567.
80. Han, L.; Tan, Y.Z.; Netke, T.; Fane, A.G.; Chew, J.W. Understanding Oily Wastewater Treatment via Membrane Distillation. *J. Memb. Sci.* **2017**, *539*, 284–294, doi:10.1016/J.MEMSCI.2017.06.012.
105. Ali Zoungrana; Ismail Zengin; Dogan Karadag; Mehmet Cakmakci Treatability of Municipal Wastewater with Direct Contact Membrane Distillation Sigma Journal of Engineering and Natural Sciences. *Sigma J. Eng. Nat. Sci.* **2017**, *8*, 245–254.
81. Lu, D.; Liu, Q.; Zhao, Y.; Liu, H.; Ma, J. Treatment and Energy Utilization of Oily Water via Integrated Ultrafiltration-Forward Osmosis–Membrane Distillation (UF-FO-MD) System. *J. Memb. Sci.* **2018**, *548*, 275–287, doi:10.1016/J.MEMSCI.2017.11.004.
41. Orange County Water District Groundwater Replenishment System 2019 Annual Report. **2020**.
82. Mikielwicz, D.; Wajs, J.; Ziolkowski, P.; Mikielwicz, J. Utilisation of Waste Heat from the Power Plant by Use of the ORC Aided with Bleed Steam and Extra Source of Heat. *Energy* **2016**, *97*, 11–19, doi:10.1016/J.ENERGY.2015.12.106.
45. Dow, N.; Gray, S.; Li, J. de; Zhang, J.; Ostarcevic, E.; Liubinas, A.; Atherton, P.; Roeszler, G.; Gibbs, A.; Duke, M. Pilot Trial of Membrane Distillation Driven by Low Grade Waste Heat: Membrane Fouling and Energy Assessment. *Desalination* **2016**, *391*, 30–42, doi:10.1016/J.DESAL.2016.01.023.

83. Tai, C.; Tian, G.; Lei, W. A Water-Heat Combined Supply System Based on Waste Heat from a Coastal Nuclear Power Plant in Northern China. *Appl. Therm. Eng.* **2022**, *200*, 117684, doi:10.1016/J.APPLTHERMALENG.2021.117684.
84. Su, Z.; Yang, L. A Novel and Efficient Cogeneration System of Waste Heat Recovery Integrated Carbon Capture and Dehumidification for Coal-Fired Power Plants. *Energy Convers. Manag.* **2022**, *255*, 115358, doi:10.1016/J.ENCONMAN.2022.115358.
85. Fathi, N.; McDaniel, P.; Aleyasin, S.S.; Robinson, M.; Vorobieff, P.; Rodriguez, S.; Oliveira, C. de Efficiency Enhancement of Solar Chimney Power Plant by Use of Waste Heat from Nuclear Power Plant. *J. Clean. Prod.* **2018**, *180*, 407–416, doi:10.1016/J.JCLEPRO.2018.01.132.
86. Obara, S.; Tanaka, R. Waste Heat Recovery System for Nuclear Power Plants Using the Gas Hydrate Heat Cycle. *Appl. Energy* **2021**, *292*, 116667, doi:10.1016/J.APENERGY.2021.116667.
87. Wealer, B.; Bauer, S.; Landry, N.; Seiß, H.; von Hirschhausen DIW Berlin, C. Navigating the Roadmap for Clean, Secure and Efficient Energy Innovation: Nuclear Power Reactors Worldwide-Tech-Nology Developments, Diffusion Patterns, and Country-by-Country Analysis of Imple-Mentation (1951-2017). **2019**.
88. Yu, M.G.; Nam, Y. Feasibility Assessment of Using Power Plant Waste Heat in Large Scale Horticulture Facility Energy Supply Systems. *Energies* 2016, Vol. 9, Page 112 **2016**, *9*, 112, doi:10.3390/EN9020112.
91. Czepiel, P.; Crill, P.; Harriss, R. Nitrous Oxide Emissions from Municipal Wastewater Treatment. *Environ. Sci. Technol.* **1995**, *29*, 2352–2356, doi:10.1021/ES00009A030/ASSET/ES00009A030.FP.PNG\_V03.
92. Sümer, E.; Weiske, A.; Benckiser, G.; Ottow, J.C.G. Influence of Environmental Conditions on the Amount of N<sub>2</sub>O Released from Activated Sludge in a Domestic Waste Water Treatment Plant. *Experientia* **1995**, *51*, 419–422, doi:10.1007/BF01928908.
93. Benckiser, G.; Eilts, R.; Linn, A.; Lorch, H.J.; Sümer, E.; Weiske, A.; Wenzhöfer, F. N<sub>2</sub>O Emissions from Different Cropping Systems and from Aerated, Nitrifying and Denitrifying Tanks of a Municipal Waste Water Treatment Plant. *Biol. Fertil. Soils* 1996 233 **1996**, *23*, 257–265, doi:10.1007/BF00335953.
90. Czepiel, P.M.; Crill, P.M.; Harriss, R.C. Methane Emissions from Municipal Wastewater Treatment Processes. *Environ. Sci. Technol.* **1993**, *27*, 2472–2477, doi:10.1021/ES00048A025/ASSET/ES00048A025.FP.PNG\_V03.
94. Wang, J.; Zhang, J.; Xie, H.; Qi, P.; Ren, Y.; Hu, Z. Methane Emissions from a Full-Scale A/A/O Wastewater Treatment Plant. *Bioresour. Technol.* **2011**, *102*, 5479–5485, doi:10.1016/J.BIORTECH.2010.10.090.
95. STOWA Emissies van Broeikasgassen van Rwzi's.
96. VROM Protocol 8136 Afvalwater, t.b.v NIR 2008 Uitgave Maart 2008 6B: CH<sub>4</sub> En N<sub>2</sub>O Uit Afvalwater, The Hague, Netherlands.
97. Daelman, M.R.J.; van Voorthuizen, E.M.; van Dongen, U.G.J.M.; Volcke, E.I.P.; van Loosdrecht, M.C.M. Methane Emission during Municipal Wastewater Treatment. *Water Res.* **2012**, *46*, 3657–3670, doi:10.1016/J.WATRES.2012.04.024.
98. Tumendelger, A.; Alshboul, Z.; Lorke, A. Methane and Nitrous Oxide Emission from Different Treatment Units of Municipal Wastewater Treatment Plants in Southwest Germany. *PLoS One* **2019**, *14*, e0209763, doi:10.1371/JOURNAL.PONE.0209763.
